# Supplementary material for: Implementing the nitrogen cycle into the dynamic global vegetation, hydrology, and crop growth model LPJmL (version 5.0)
Source: Copernicus journal article supplement (doi:10.5194/gmd-11-2789-2018), 2018-07-12
Supplement: Supplementary file 1 [file gmd-11-2789-2018-supplement.zip]

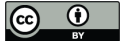

*Supplement of*

**Implementing the nitrogen cycle into the dynamic global vegetation, hydrology, and crop growth model LPJmL (version 5.0)**

**Werner von Bloh et al.**

*Correspondence to:* Werner von Bloh ([bloh@pik-potsdam.de](mailto:bloh@pik-potsdam.de))

- [gmd-11-2789-2018-supplement-title-page.pdf](#)
- [ggcmoutput\\_20180517\\_044140\\_wheat\\_slim.zip](#)
- [ggcmoutput\\_20180517\\_051843\\_maize\\_slim.zip](#)
- [ggcmoutput\\_20180517\\_064113\\_rice\\_slim.zip](#)
- [ggcmoutput\\_20180517\\_070417\\_soy\\_slim.zip](#)
- [lpjml\\_nitrogen\\_SI.pdf](#)

The copyright of individual parts of the supplement might differ from the CC BY 4.0 License.
