# Supplementary material for: Implementing the nitrogen cycle into the dynamic global vegetation, hydrology, and crop growth model LPJmL (version 5.0)
Source: Copernicus journal article supplement (doi:10.5194/gmd-11-2789-2018), 2018-07-12
Supplement: Supplementary file 2 [file gmd-11-2789-2018-supplement.zip]

# Supplement of Implementing the Nitrogen cycle into the dynamic global vegetation, hydrology and crop growth model LPJmL

W. von Bloh et al.

Correspondence to: Werner von Bloh (bloh@pik-potsdam.de)

## S1 Supplementary information to the nitrogen implementation of the LPJmL5 model

The supplement contains tables of parameters used in the model (Table S1 and S2) and graphical representations of leaf C:N ratios for different exponential factors (Fig. S1), daily gross photosynthesis rate as a function of light- and Rubisco limited photosynthesis rate (Fig. S2), temperature response function  $F_1(T)$  (Fig. S3), and water response function  $F_2(W)$  (Fig. S4). Furthermore comparisons of net ecosystem exchange rates and evaporation fluxes with EDDY flux tower measurements (ORNL DAAC, 2011) for a variety of sites are shown (Figs. S5-S11 and Figs. S12-S20, respectively). Taylor diagrams of the spatial patterns (national mean yields) of wheat, maize, rice and soybean are plotted in Figs. S21-S24. Wheat, rice and soybean simulations for the 10 top-producing countries for the carbon-only LPJmL3.5 version, the version with N limitation and with unlimited N supply are shown in Figs. S25-S27.

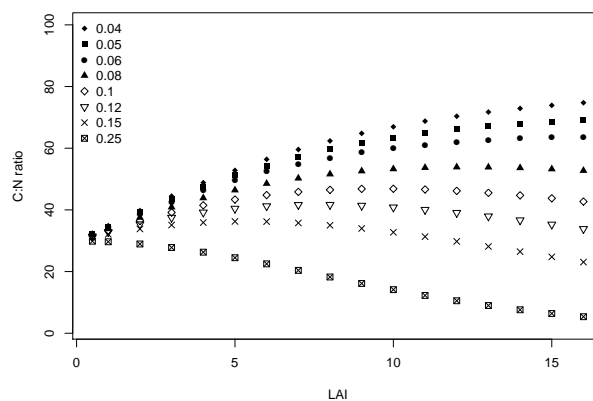

**Figure S1.** Leaf C:N ratio of the canopy as a function of LAI for different pre-factors of the exponential term in Eq. (2).

**Table S1.** List of PFT-specific parameters (maximum N uptake rate  $N_{\text{up,root}}$ , increase in N demand  $k_{\text{store}}$ , N recover fraction at turnover  $k_{\text{turn}}$ , minimum canopy conductance  $g_{\text{min}}$ , maximum water transport capacity  $E_{\text{max}}$ ) used in the LPJmL5 model.

| PFT                                    | $N_{\text{up,root}}$<br>(gN kgC <sup>-1</sup> ) | $k_{\text{store}}$ | $k_{\text{turn}}$<br>(%) | $g_{\text{min}}$<br>(mm s <sup>-1</sup> ) | $E_{\text{max}}$<br>(mm day <sup>-1</sup> ) |
|----------------------------------------|-------------------------------------------------|--------------------|--------------------------|-------------------------------------------|---------------------------------------------|
| Tropical broadleaved evergreen tree    | 2.8                                             | 1.15               | 80                       | 1.6                                       | 10                                          |
| Tropical broadleaved raingreen tree    | 2.8                                             | 1.15               | 30                       | 1.8                                       | 10                                          |
| Temperate needleleaved evergreen tree  | 2.8                                             | 1.15               | 80                       | 1.0                                       | 7                                           |
| Temperate broadleaved evergreen tree   | 2.8                                             | 1.15               | 80                       | 1.5                                       | 7                                           |
| Temperate broadleaved summergreen tree | 2.8                                             | 1.15               | 30                       | 1.0                                       | 7                                           |
| Boreal needleleaved evergreen tree     | 2.8                                             | 1.15               | 80                       | 0.8                                       | 7                                           |
| Boreal broadleaved summergreen tree    | 2.8                                             | 1.15               | 30                       | 0.8                                       | 7                                           |
| Boreal needleleaved summergreen tree   | 2.8                                             | 1.15               | 30                       | 0.3                                       | 7                                           |
| C3 perennial grass                     | 5.1                                             | 1.3                | 30                       | 0.8                                       | 7                                           |
| C4 perennial grass                     | 5.1                                             | 1.3                | 30                       | 1.5                                       | 10                                          |
| All crops                              | 5.1                                             | 1.3                | 30                       | 0.8                                       | 8                                           |

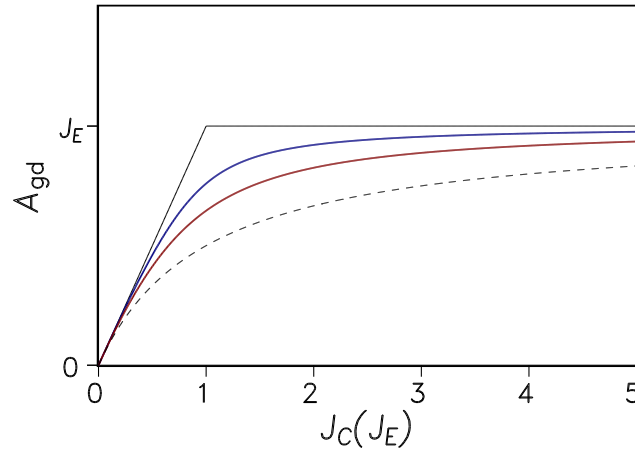

**Figure S2.** Daily gross photosynthesis rate  $A_{\text{gd}}$  as a function of Rubisco-limited photosynthesis rate  $J_C$  for fixed light-limited rate  $J_E$  and daylength set to 1. The black solid curve is for shape parameter  $\theta = 1$  ( $A_{\text{gd}} = \min(J_E, J_C)/\text{daylength}$ ), the blue curve for  $\theta = 0.9$  (LPJmL5), the red curve for  $\theta = 0.7$  (LPJmL3.5) and the black dashed curve for  $\theta \rightarrow 0$  ( $A_{\text{gd}} = J_E \cdot J_C / ((J_E + J_C) \cdot \text{daylength})$ ).

**Table S2.** List of parameters used in the LPJmL5 model.

| Parameter                 | Description                                                            | Value                                      | Units              |
|---------------------------|------------------------------------------------------------------------|--------------------------------------------|--------------------|
| $\alpha_a$                | Fraction of PAR assimilated at ecosystem level, relative to leaf level | 0.6                                        | -                  |
| $\alpha_m$                | Maximum Priestley-Taylor coefficient                                   | 1.485                                      | -                  |
| $g_m$                     | Conductance scaling factor                                             | 2.41                                       | -                  |
| $\theta$                  | Shape parameter for co-limitation of photosynthesis                    | 0.9                                        | -                  |
| $K_{N,\min}$              | Michaelis constant of N uptake                                         | 1.48                                       | $\text{gN m}^{-2}$ |
| $k_{N,\min}$              | Basal rate of N uptake                                                 | 0.05                                       | -                  |
| $f_{\text{heartwood}}$    | Fraction of sapwood nitrogen going into heartwood                      | 0.7                                        | -                  |
| $K_M$                     | Michaelis constant of photosynthesis reduction                         | 0.1                                        | -                  |
| $K_{\max}$                | Maximum rate of $\text{NH}_4^+$ nitrified                              | 0.1                                        | $\text{d}^{-1}$    |
| $a$                       | Parameter in limiting function for temperature $F_1(T)$                | 8.79                                       | $^{\circ}\text{C}$ |
| $b$                       | Parameter in limiting function for temperature $F_1(T)$                | 5.26                                       | -                  |
| $a_{\text{nit}}$          | Parameter in water response function $F_1(W_{\text{sat}})$             | 0.6 (medium soil), 0.55 (sandy soil)       | -                  |
| $b_{\text{nit}}$          | Parameter in water response function $F_1(W_{\text{sat}})$             | 1.27 (medium soil), 1.7 (sandy soil)       | -                  |
| $c_{\text{nit}}$          | Parameter in water response function $F_1(W_{\text{sat}})$             | 0.001 (medium soil), $-0.007$ (sandy soil) | -                  |
| $d_{\text{nit}}$          | Parameter in water response function $F_1(W_{\text{sat}})$             | 2.84 (medium soil), 3.22 (sandy soil)      | -                  |
| CDN                       | Shape coefficient for $F_2(T, C)$                                      | 1.4                                        | -                  |
| $A_f$                     | Fraction of decomposed N mineralized                                   | 0.6                                        | -                  |
| $F_f$                     | Fraction of humified N going into fast pool                            | 0.98                                       | -                  |
| $\beta_{\text{NO}_3^-}$   | $\text{NO}_3^-$ percolation coefficient                                | 0.4                                        | -                  |
| $\text{CN}_{\text{soil}}$ | Desired C:N ratio of soils                                             | 15                                         | -                  |
| $k_{\text{soil10}}^f$     | Decomposition rate of fast pool                                        | 0.03                                       | $\text{yr}^{-1}$   |
| $k_{\text{soil10}}^s$     | Decomposition rate of slow pool                                        | 0.001                                      | $\text{yr}^{-1}$   |
| $r_{\text{mx}}$           | Fraction of denitrified N lost as $\text{N}_2\text{O}$                 | 0.11                                       | -                  |
| $\theta$                  | Fractional pore space                                                  | 0.4                                        | -                  |
| $K_2$                     | Fraction of nitrified N lost as $\text{N}_2\text{O}$ flux              | 0.02                                       | -                  |
| $K_N$                     | Michaelis constant of N immobilization                                 | $5 \times 10^{-3}$                         | $\text{gN m}^{-3}$ |
| $T_0$                     | Parameter in temperature uptake function                               | $-25$                                      | $^{\circ}\text{C}$ |
| $T_m$                     | Parameter in temperature uptake function                               | 15                                         | $^{\circ}\text{C}$ |
| $T_r$                     | Parameter in temperature uptake function                               | 15                                         | $^{\circ}\text{C}$ |
| $q_{\text{ash}}$          | Fraction of fire N going to the top soil layer                         | 0.45                                       | -                  |

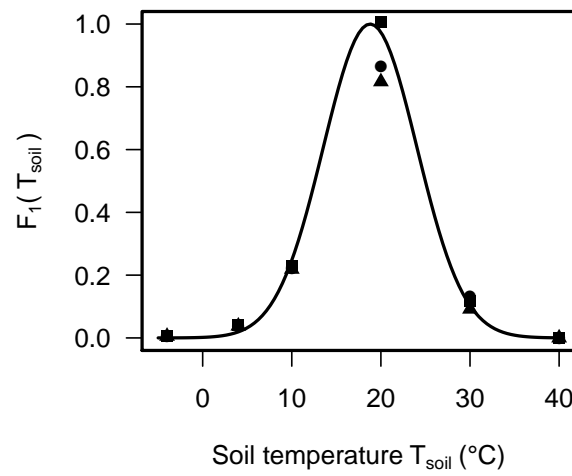

**Figure S3.** Temperature response data for site in the US (filled squares), Canada (filled circles) and Australia (filled triangles) and fitted function (solid line) used in Eq. (36).

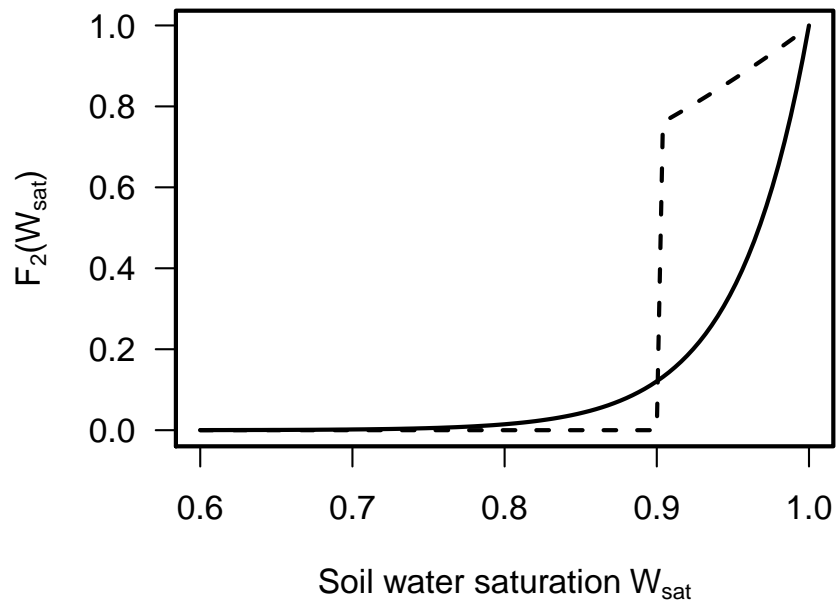

**Figure S4.** Water response functions  $F_2(W_{\text{sat}})$  parameterized according to Krysanova and Wechsung (2000) (dashed line) and according to Eq. (43) in the main text (solid line).

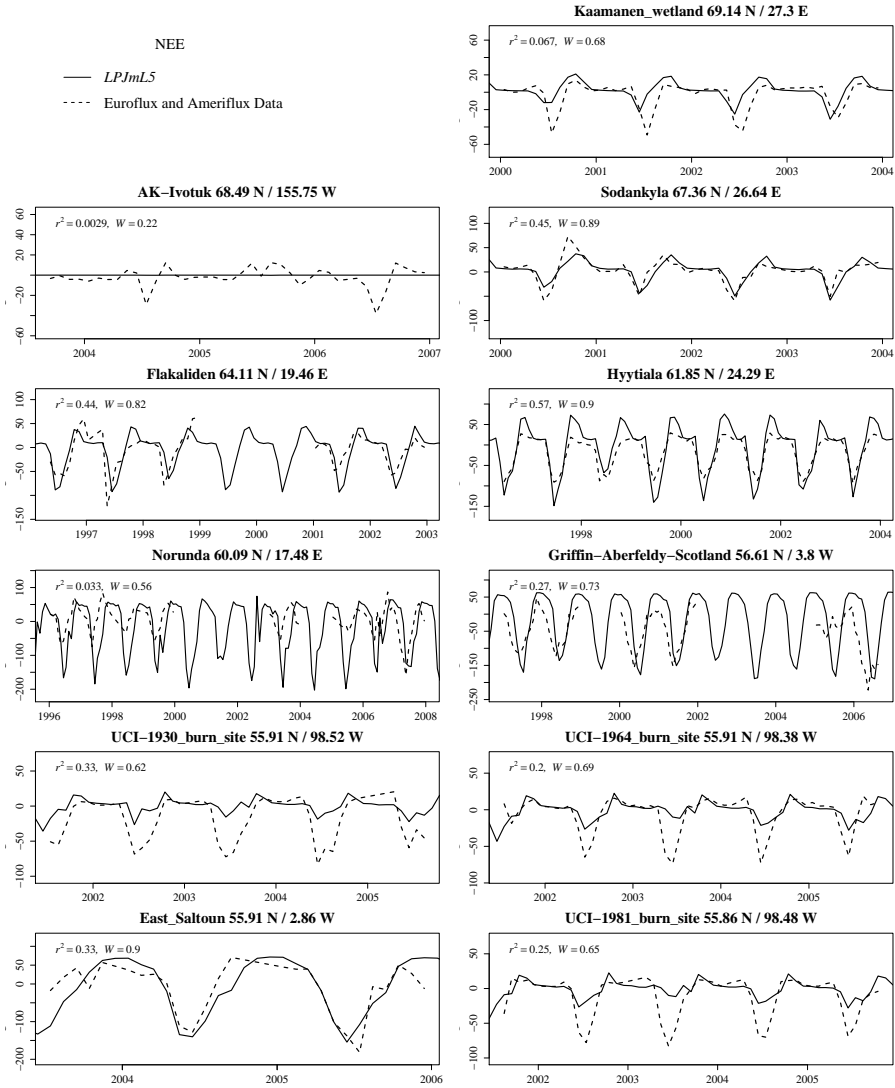

**Figure S5.** Comparison of net ecosystem exchange rates (NEE, in  $\text{gC m}^{-2} \text{d}^{-1}$ ) simulated with eddy flux tower rates measured,  $W$  denotes the Willmott coefficient of agreement.

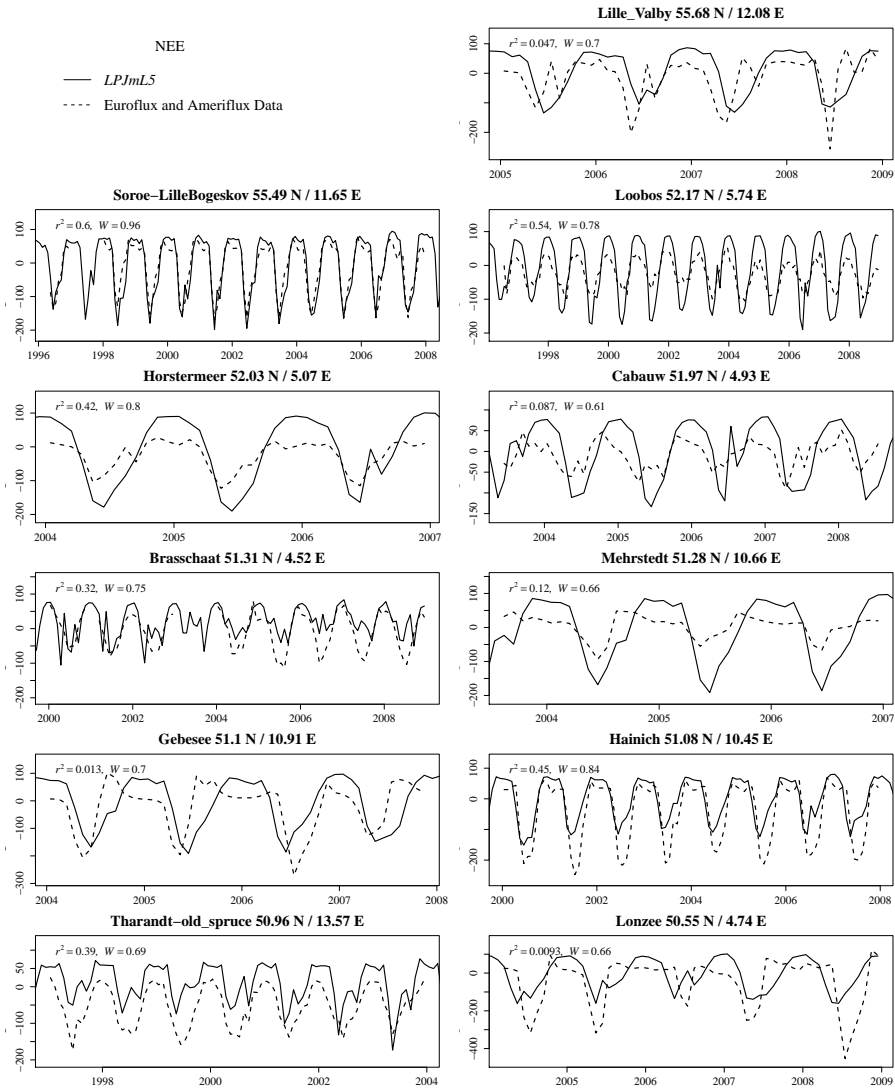

**Figure S6.** Comparison of net ecosystem exchange rates (NEE, in  $\text{gC m}^{-2} \text{d}^{-1}$ ) simulated with eddy flux tower rates measured,  $W$  denotes the Willmott coefficient of agreement.

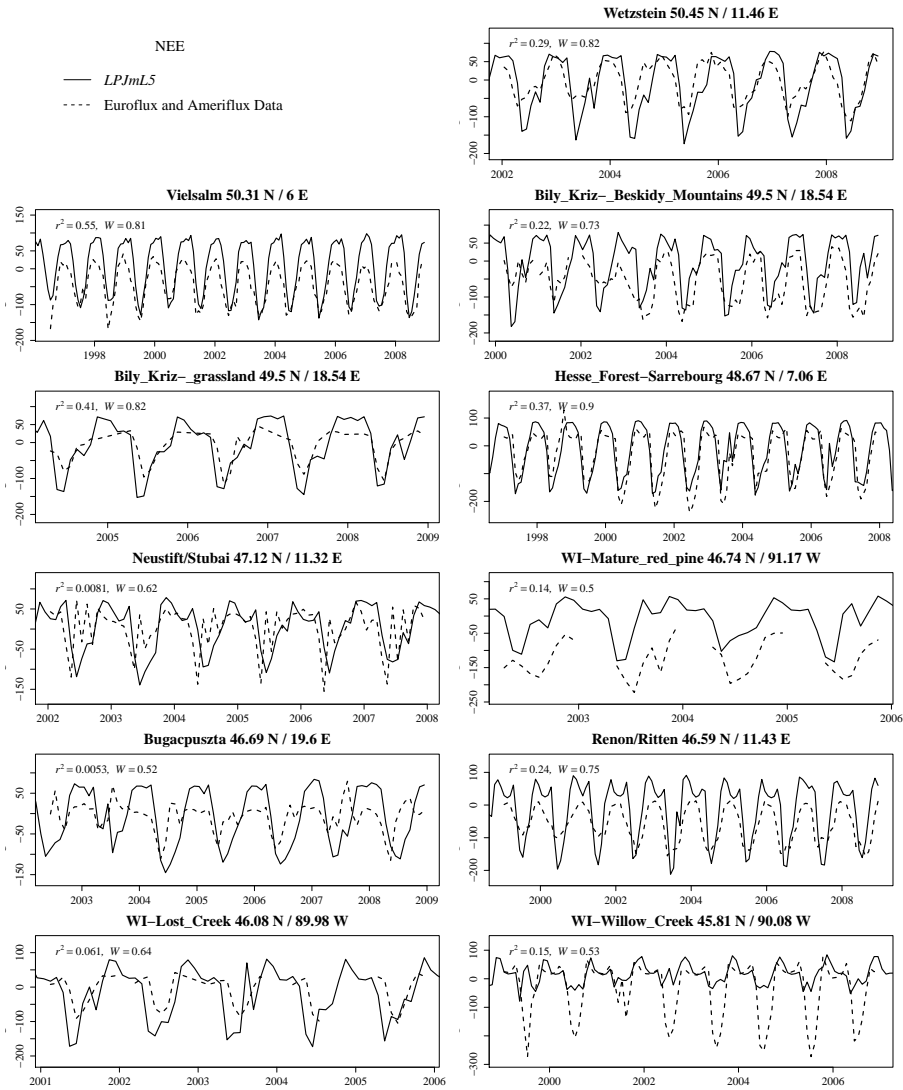

**Figure S7.** Comparison of net ecosystem exchange rates (NEE, in  $\text{gC m}^{-2} \text{d}^{-1}$ ) simulated with eddy flux tower rates measured,  $W$  denotes the Willmott coefficient of agreement.



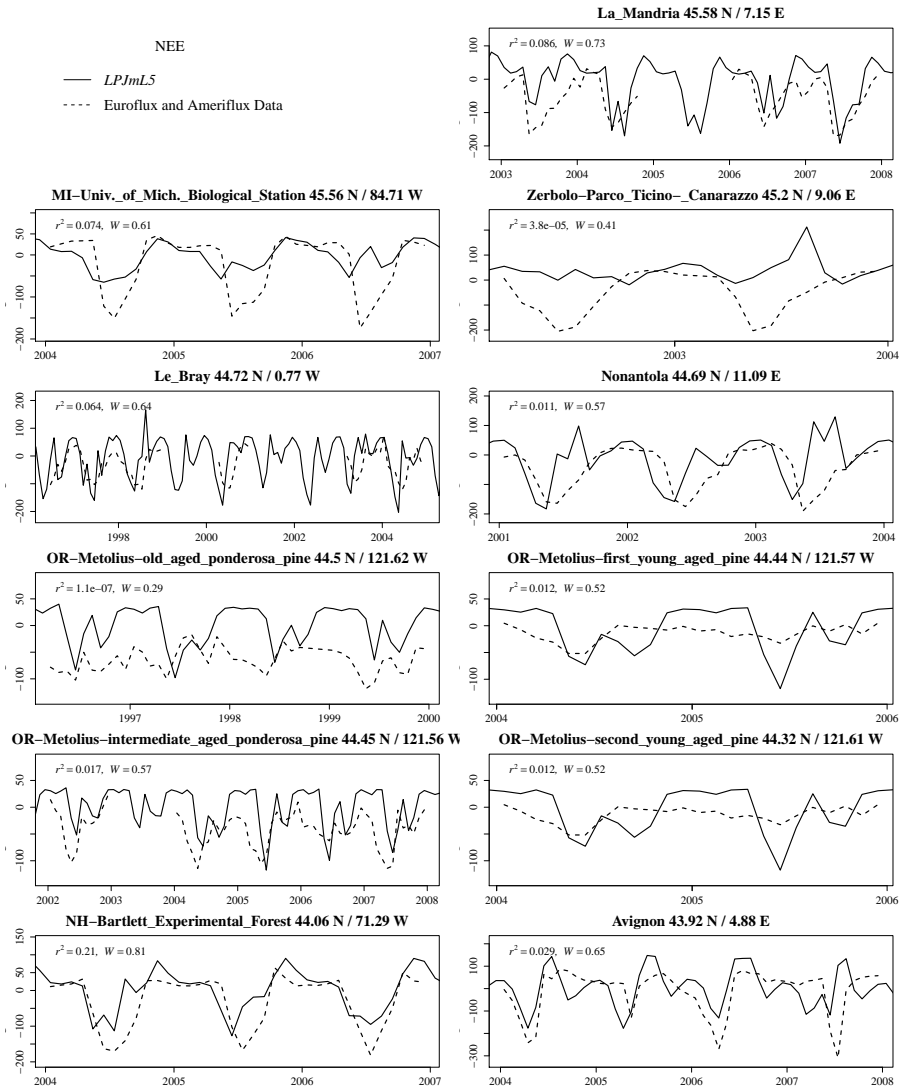

**Figure S8.** Comparison of net ecosystem exchange rates (NEE, in  $\text{gC m}^{-2} \text{d}^{-1}$ ) simulated with eddy flux tower rates measured,  $W$  denotes the Willmott coefficient of agreement.

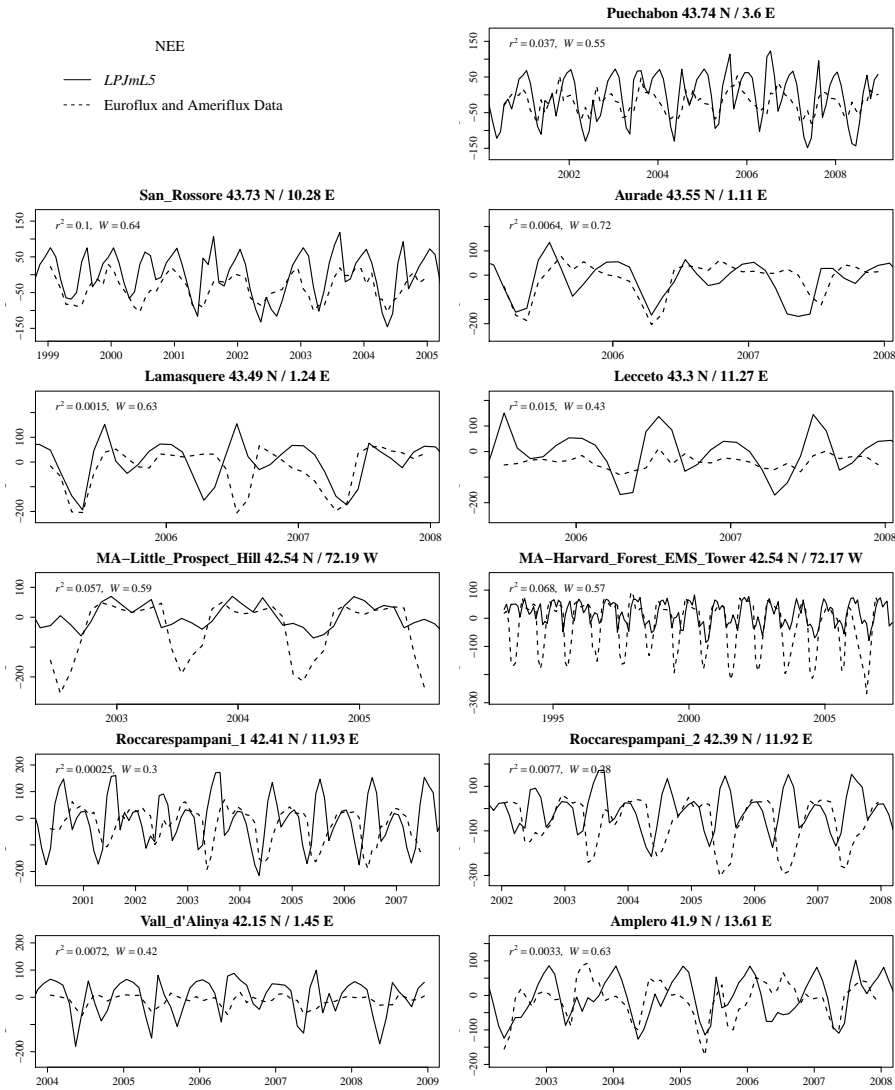

**Figure S9.** Comparison of net ecosystem exchange rates (NEE, in  $\text{gC m}^{-2} \text{d}^{-1}$ ) simulated with eddy flux tower rates measured,  $W$  denotes the Willmott coefficient of agreement.

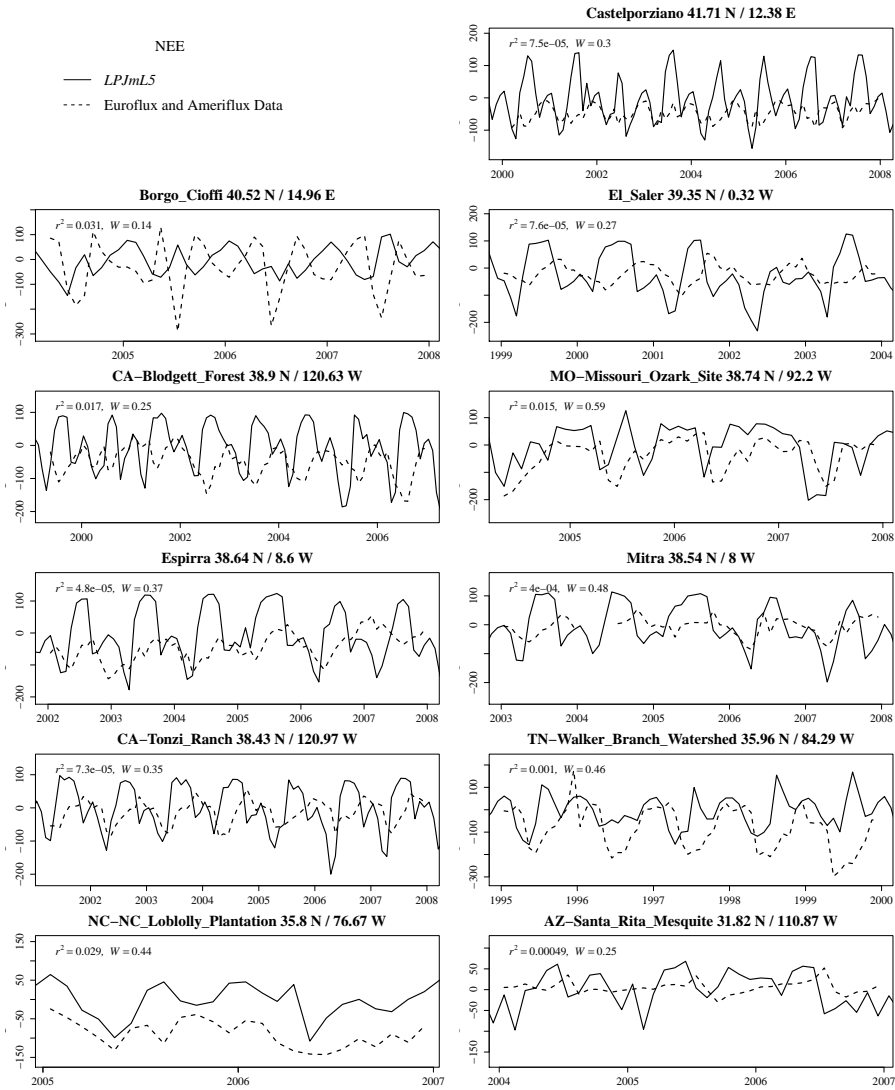

**Figure S10.** Comparison of net ecosystem exchange rates (NEE, in  $\text{gC m}^{-2} \text{d}^{-1}$ ) simulated with eddy flux tower rates measured,  $W$  denotes the Willmott coefficient of agreement.

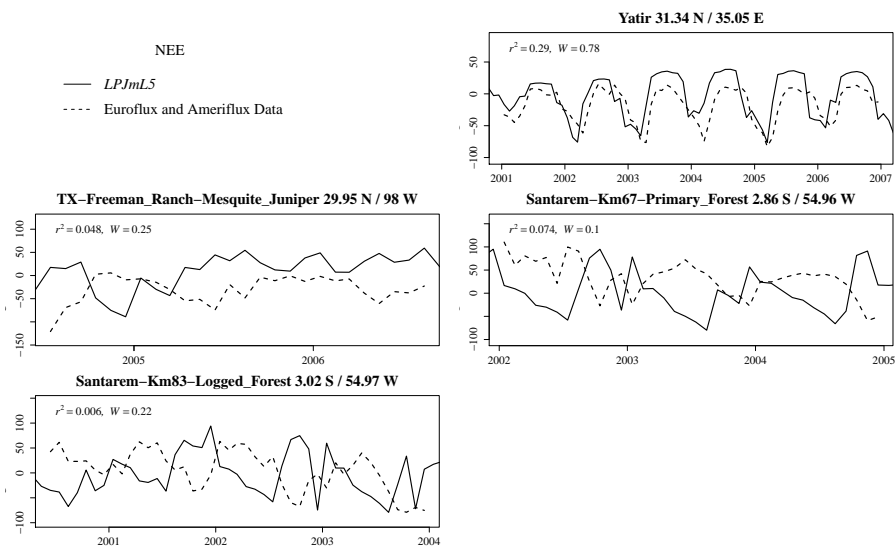

**Figure S11.** Comparison of net ecosystem exchange rates (NEE, in  $\text{gC m}^{-2} \text{d}^{-1}$ ) simulated with eddy flux tower rates measured.

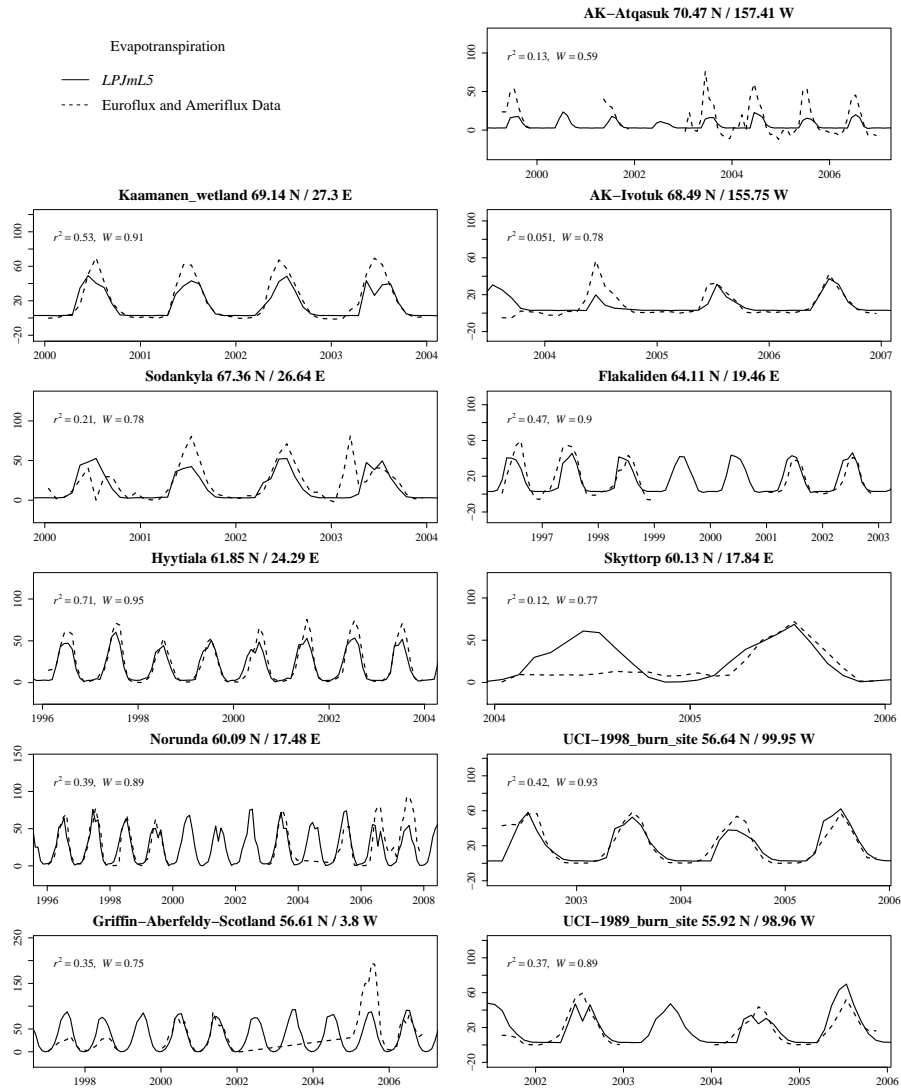

**Figure S12.** Comparison of evapotranspiration fluxes (in  $\text{mm d}^{-1}$ ) with EDDY-flux measurements,  $W$  denotes the Willmott coefficient of agreement.

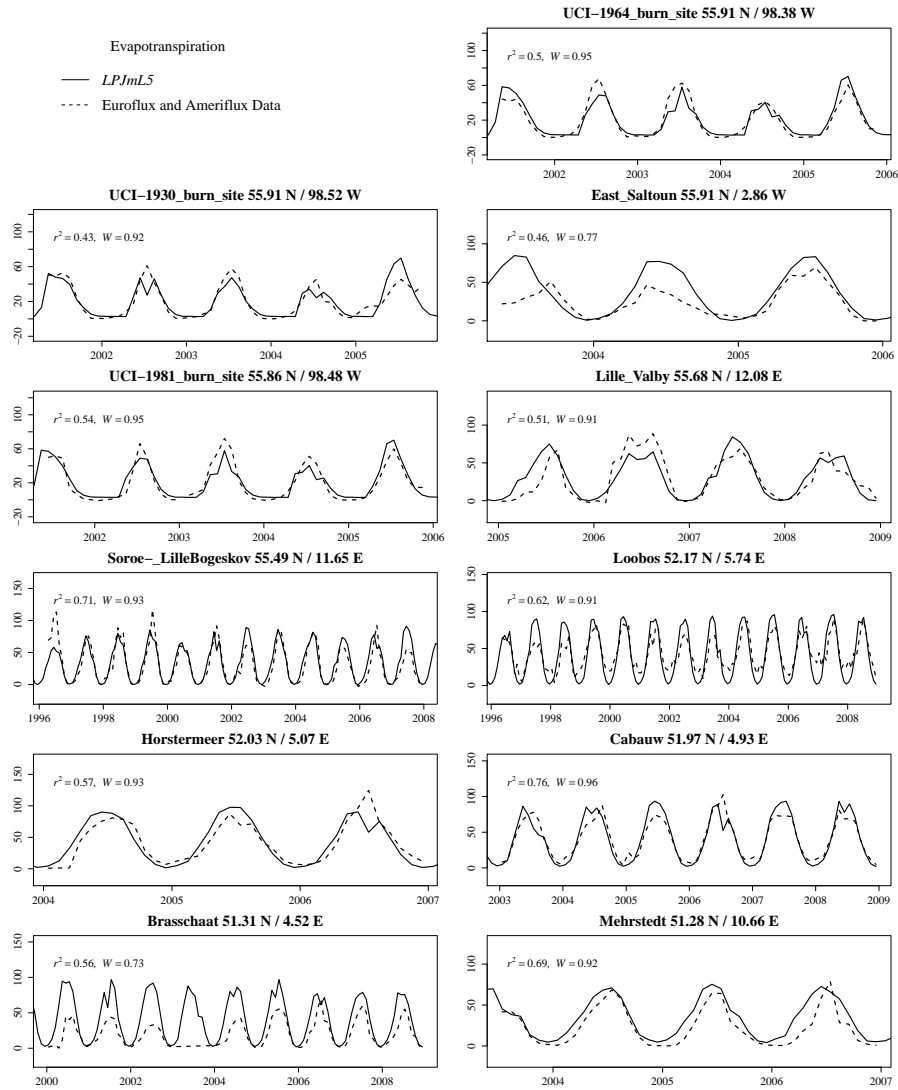

**Figure S13.** Comparison of evapotranspiration fluxes (in  $\text{mm d}^{-1}$ ) with EDDY-flux measurements,  $W$  denotes the Willmott coefficient of agreement.

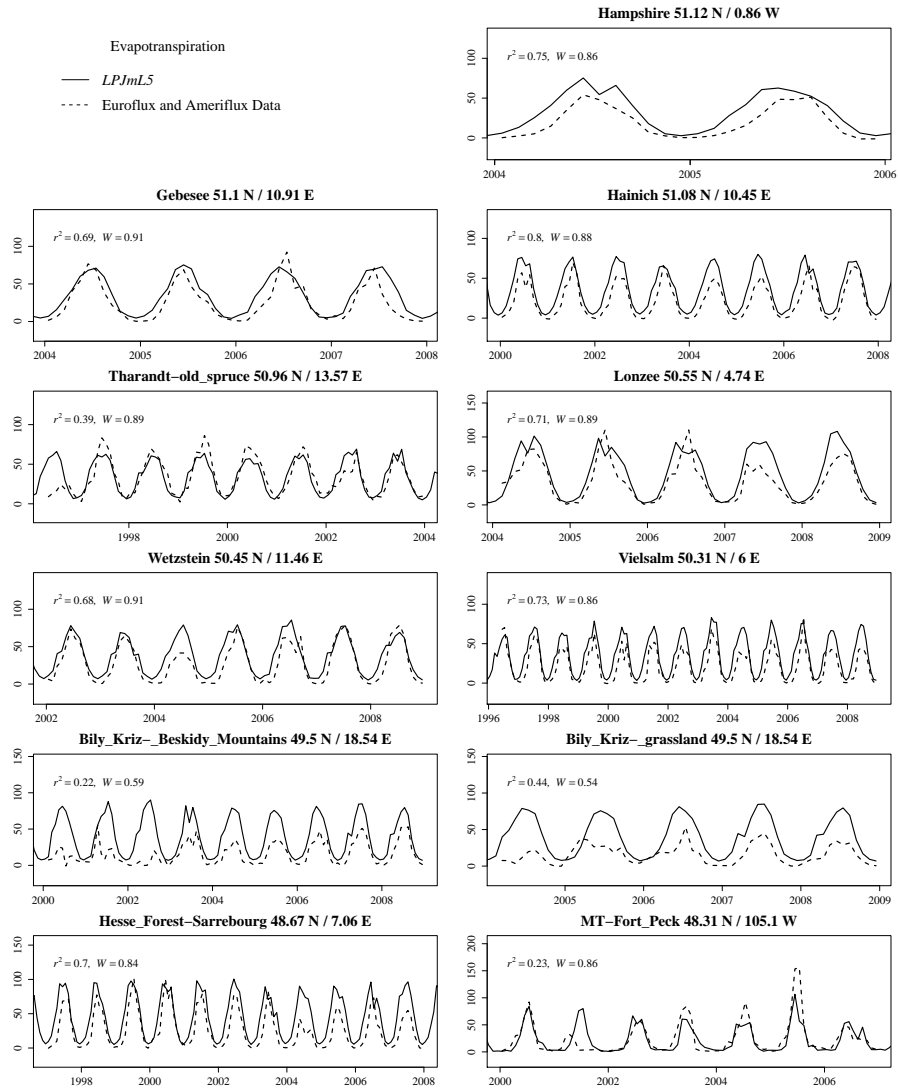

**Figure S14.** Comparison of evapotranspiration fluxes (in  $\text{mm d}^{-1}$ ) with EDDY-flux measurements,  $W$  denotes the Willmott coefficient of agreement.

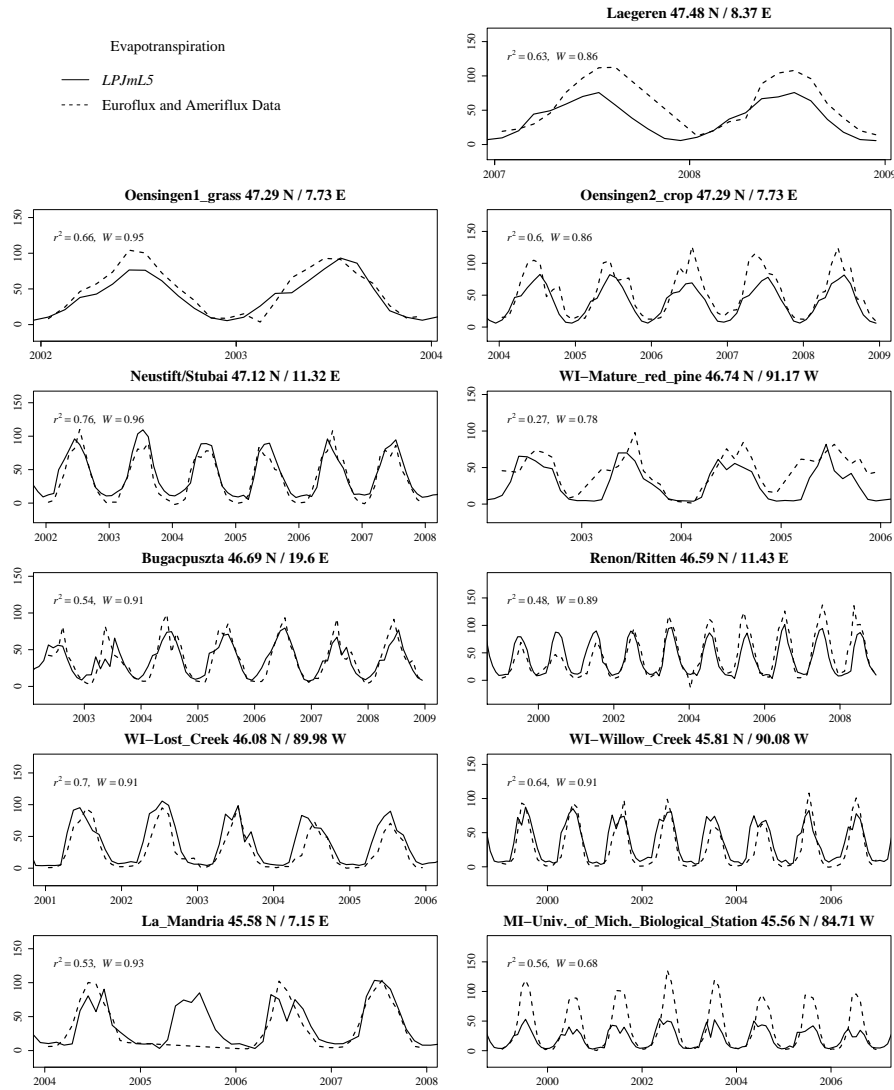

**Figure S15.** Comparison of evapotranspiration fluxes (in  $\text{mm d}^{-1}$ ) with EDDY-flux measurements,  $W$  denotes the Willmott coefficient of agreement.



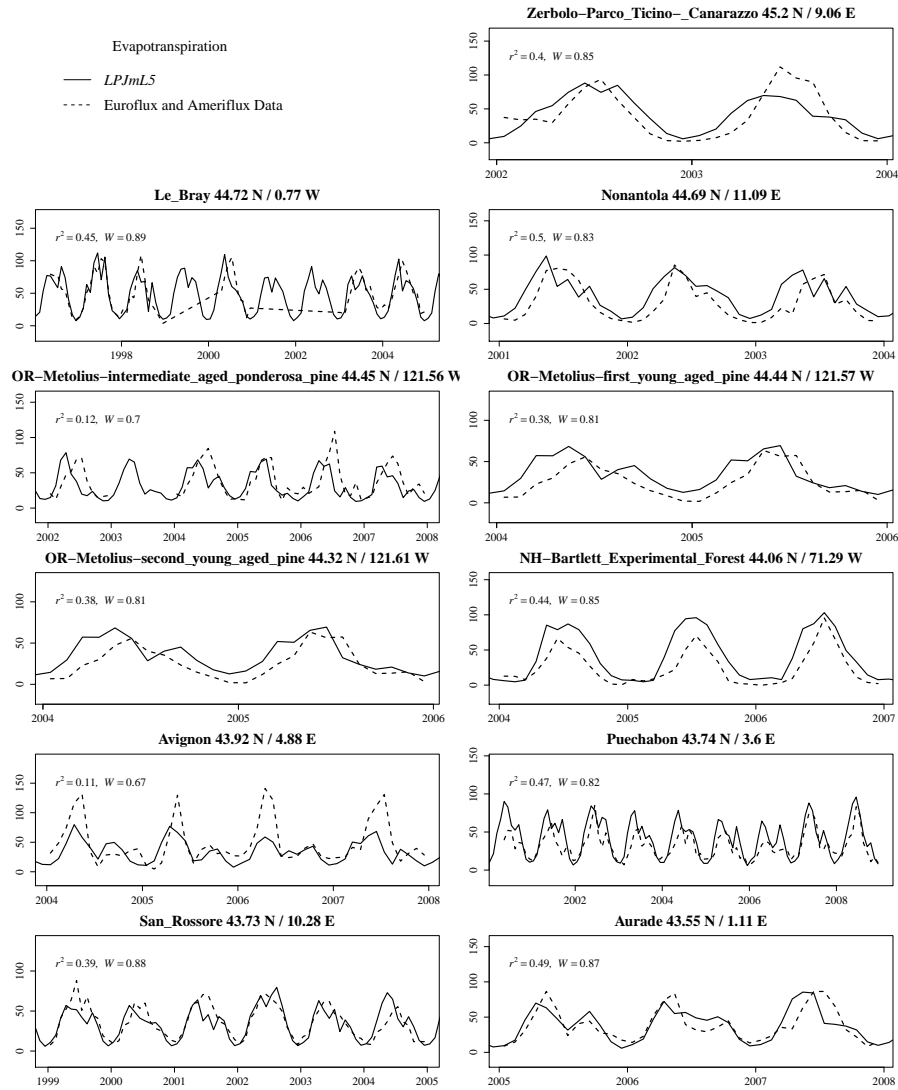

**Figure S16.** Comparison of evapotranspiration fluxes (in  $\text{mm d}^{-1}$ ) with EDDY-flux measurements,  $W$  denotes the Willmott coefficient of agreement.

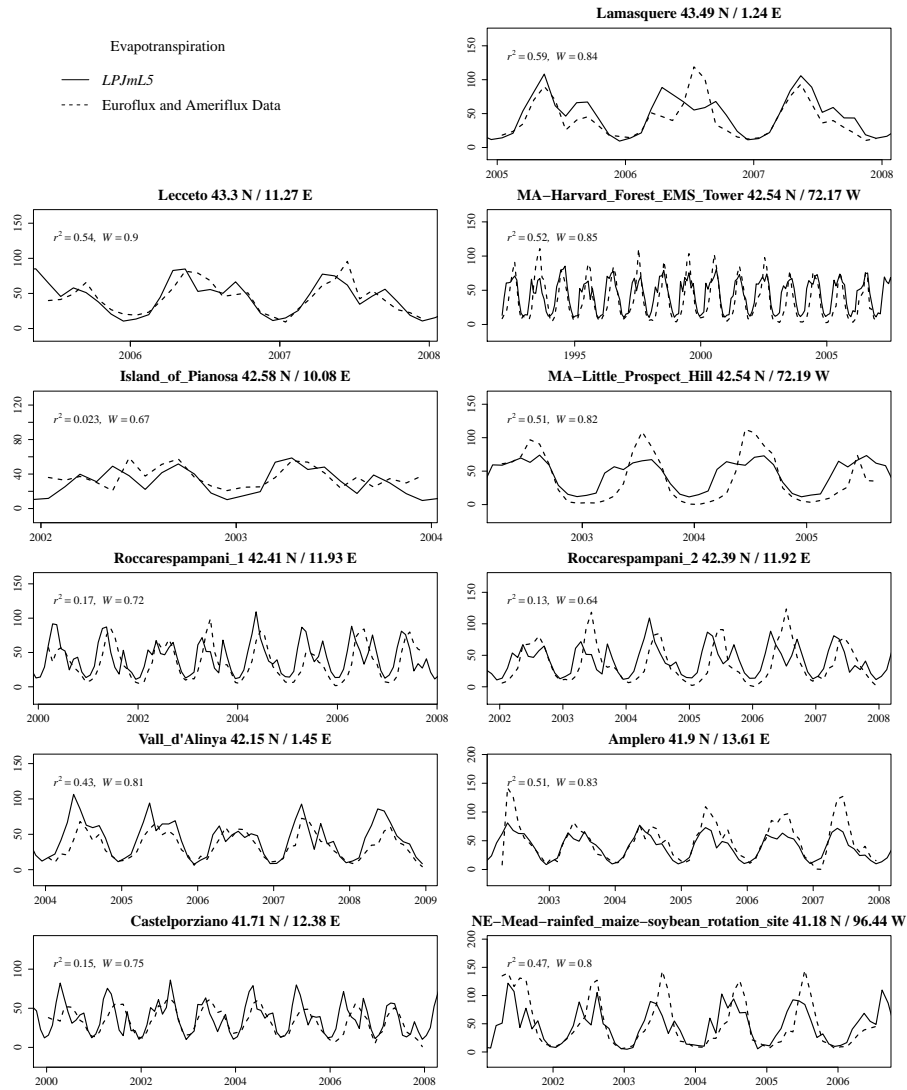

**Figure S17.** Comparison of evapotranspiration fluxes (in  $\text{mm d}^{-1}$ ) with EDDY-flux measurements,  $W$  denotes the Willmott coefficient of agreement.

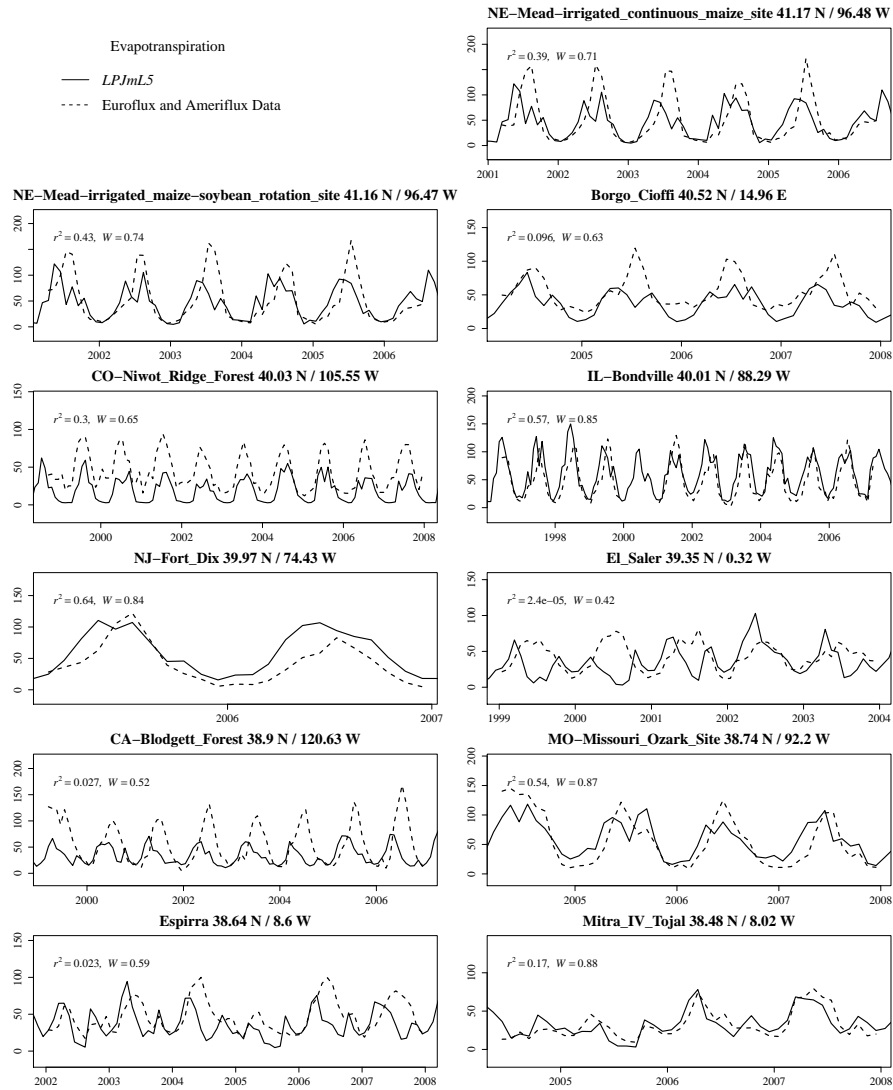

**Figure S18.** Comparison of evapotranspiration fluxes (in  $\text{mm d}^{-1}$ ) with EDDY-flux measurements,  $W$  denotes the Willmott coefficient of agreement.

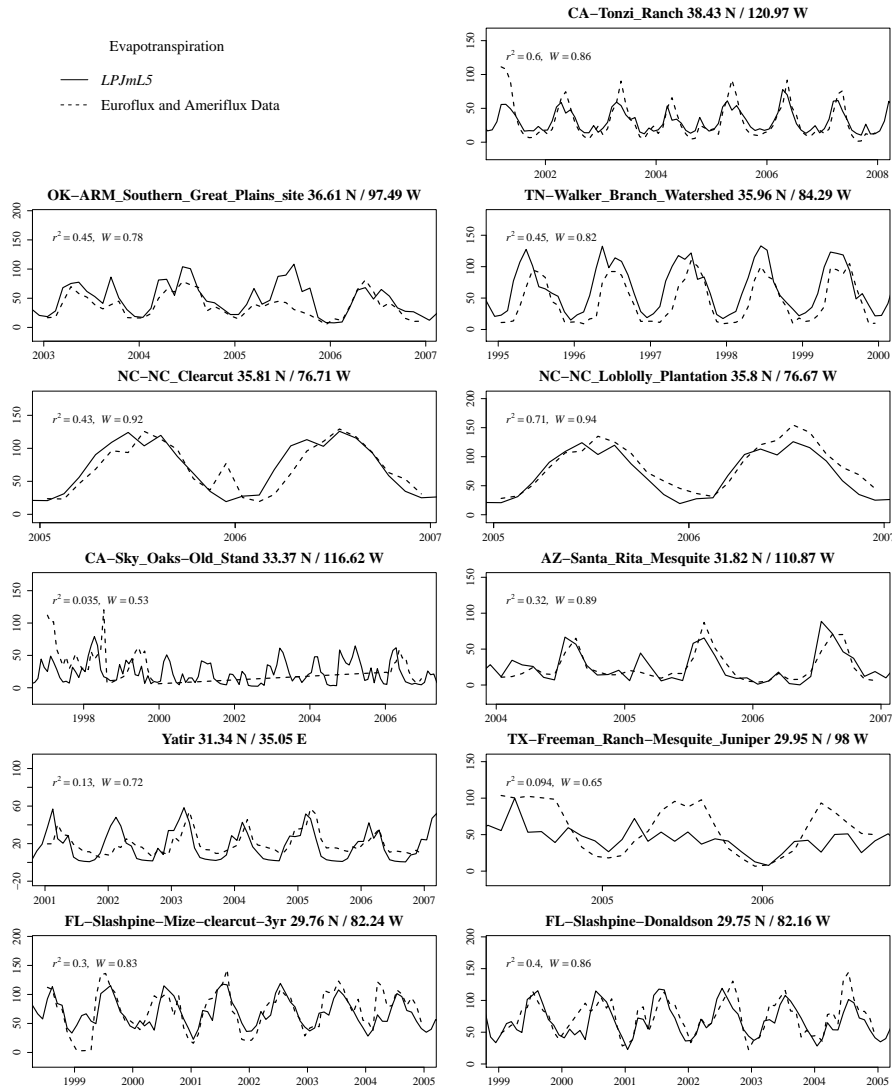

**Figure S19.** Comparison of evapotranspiration fluxes (in  $\text{mm d}^{-1}$ ) with EDDY-flux measurements,  $W$  denotes the Willmott coefficient of agreement.

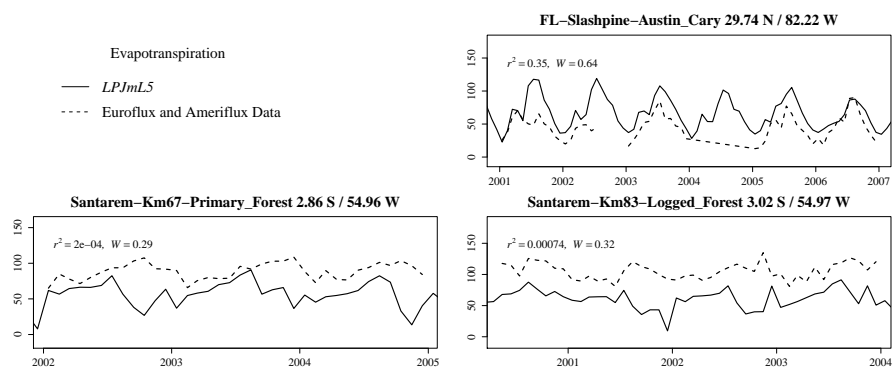

**Figure S20.** Comparison of evapotranspiration fluxes (in  $\text{mm d}^{-1}$ ) with EDDY-flux measurements,  $W$  denotes the Willmott coefficient of agreement.

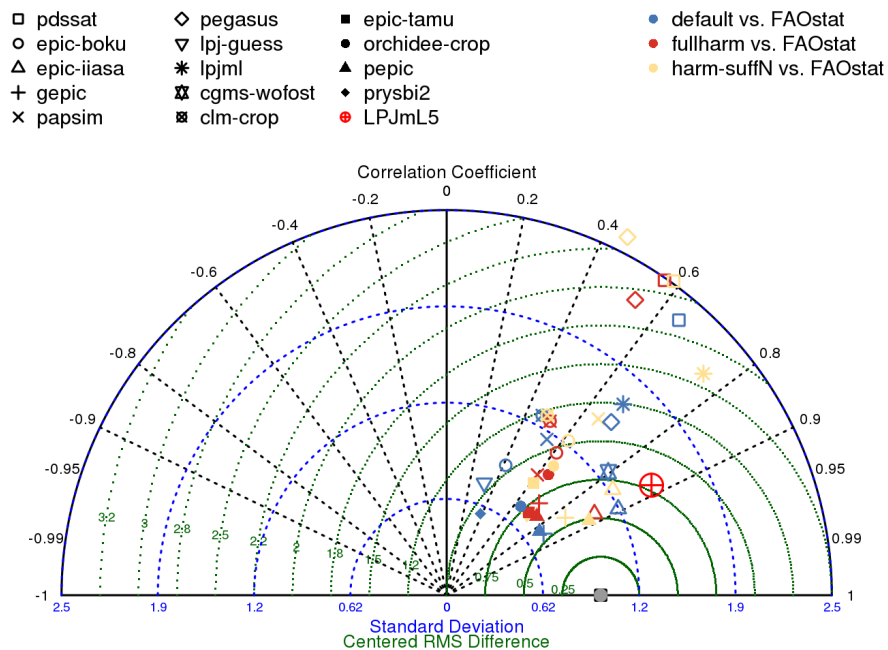

**Figure S21.** Taylor diagram of the spatial patterns (national mean yields) of wheat productivity. The performance of *LPJmL5* is depicted as the red circlecross ( $\oplus$ ) and should be compared to the *LPJmL3.5* simulations, depicted as stars (\*) in yellow (un-calibrated) and blue (calibrated). This figure was produced by the online crop model evaluation tool of Müller et al. (2017).

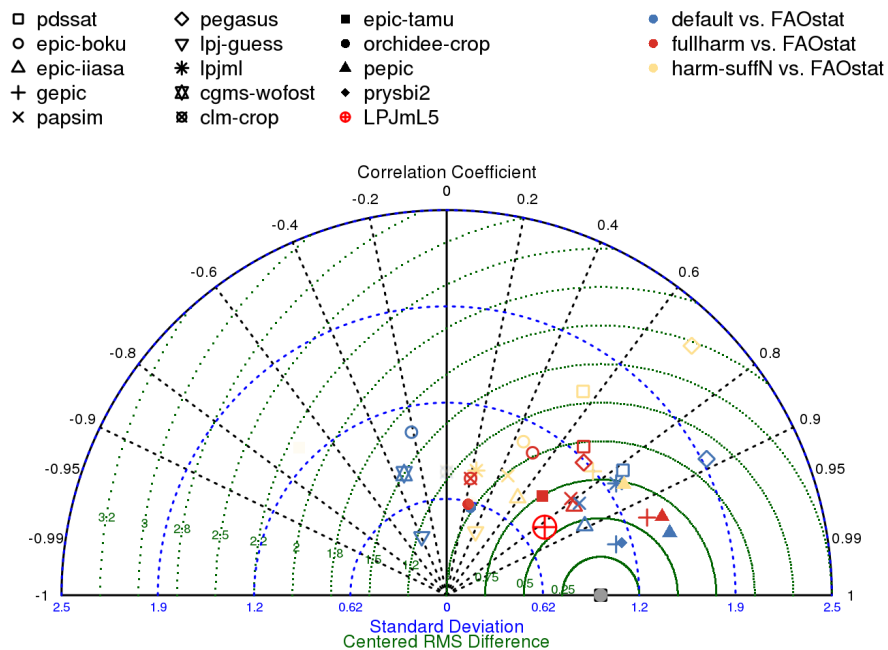

**Figure S22.** Taylor diagram of the spatial patterns (national mean yields) of maize productivity. The performance of *LPJmL5* is depicted as the red circlecross ( $\oplus$ ) and should be compared to the *LPJmL3.5* simulations, depicted as stars ( $\ast$ ) in yellow (uncalibrated) and blue (calibrated). This figure was produced by the online crop model evaluation tool of Müller et al. (2017).

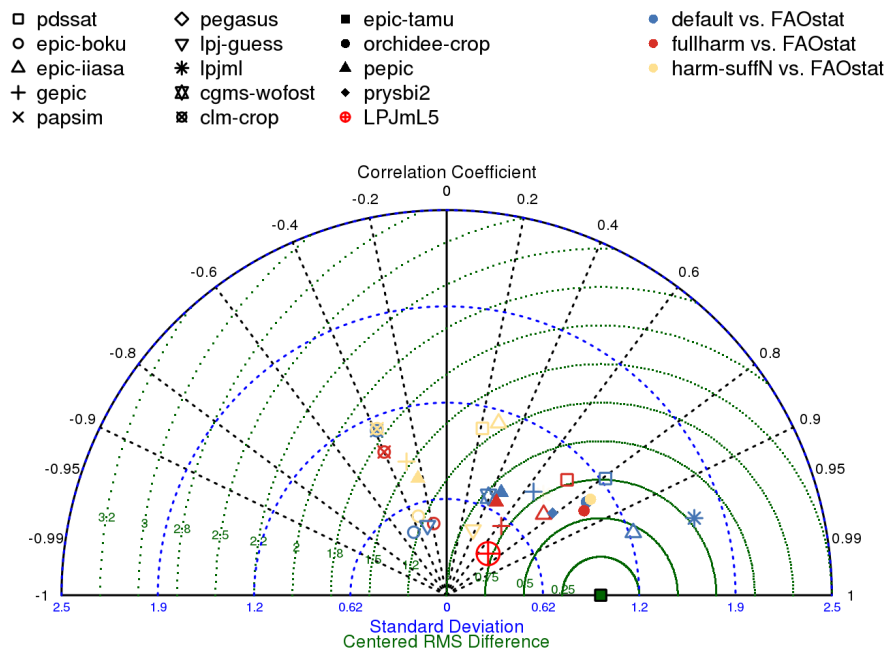

**Figure S23.** Taylor diagram of the spatial patterns (national mean yields) of rice productivity. The performance of *LPJmL5* is depicted as the red circlecross ( $\oplus$ ) and should be compared to the *LPJmL3.5* simulations, depicted as stars (\*) in yellow (un-calibrated) and blue (calibrated). This figure was produced by the online crop model evaluation tool of Müller et al. (2017).



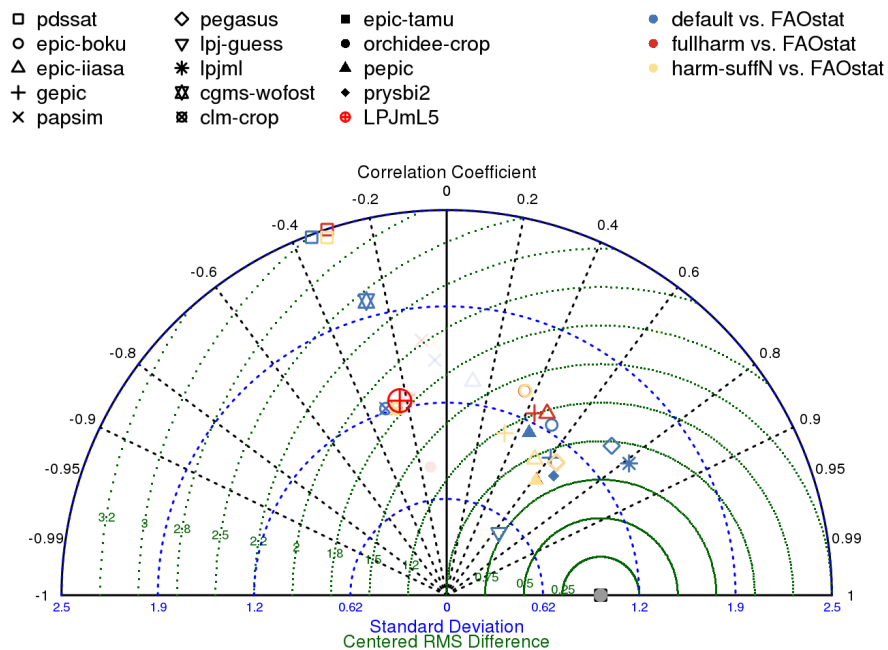

**Figure S24.** Taylor diagram of the spatial patterns (national mean yields) of soybean productivity. The performance of *LPJmL5* is depicted as the red circlecross ( $\oplus$ ) and should be compared to the *LPJmL3.5* simulations, depicted as stars (\*) in yellow (un-calibrated) and blue (calibrated). This figure was produced by the online crop model evaluation tool of Müller et al. (2017).

## References

- Krysanova, V. and Wechsung, F.: SWIM (Soil and Water Integrated Model) User Manual, <https://www.pik-potsdam.de/members/valen/swim>, 2000.
- Müller, C., Elliott, J., Chryssanthacopoulos, J., Arneth, A., Balkovic, J., Ciais, P., Deryng, D., Folberth, C., Glotter, M., Hoek, S., Iizumi, T., Izaurrealde, R. C., Jones, C., Khabarov, N., Lawrence, P., Liu, W., Olin, S., Pugh, T. A. M., Ray, D. K., Reddy, A., Rosenzweig, C., Ruane, A. C., Sakurai, G., Schmid, E., Skalsky, R., Song, C. X., Wang, X., de Wit, A., and Yang, H.: Global gridded crop model evaluation: benchmarking, skills, deficiencies and implications, *Geoscientific Model Development*, 10, 1403–1422, doi:10.5194/gmd-10-1403-2017, 2017.
- ORNL DAAC, Oak Ridge, T. U.: Oak Ridge National Laboratory Distributed Active Archive Center (ORNL DAAC), <http://fluxnet.ornl.gov/>, 2011.

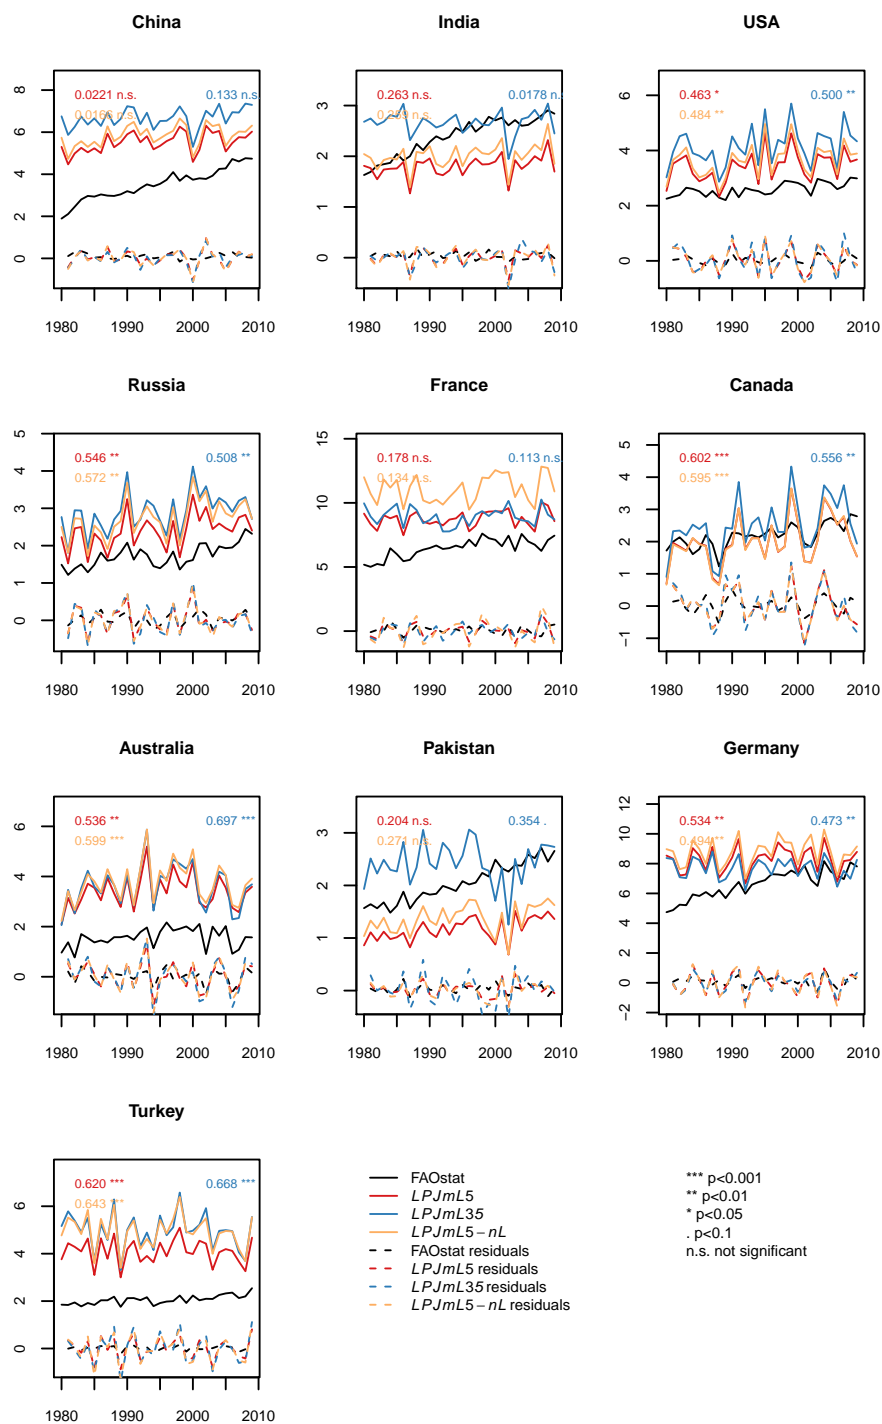

**Figure S25.** Wheat yield simulations (in t fresh matter (FM) ha<sup>-1</sup>) for the 10 top-producing countries for the carbon-only LPJmL3.5 version (LPJmL35), the version with N limitation (LPJmL5) and with unlimited N supply (LPJmL5-nL). The residuals plotted are the detrended observed and simulated yields.

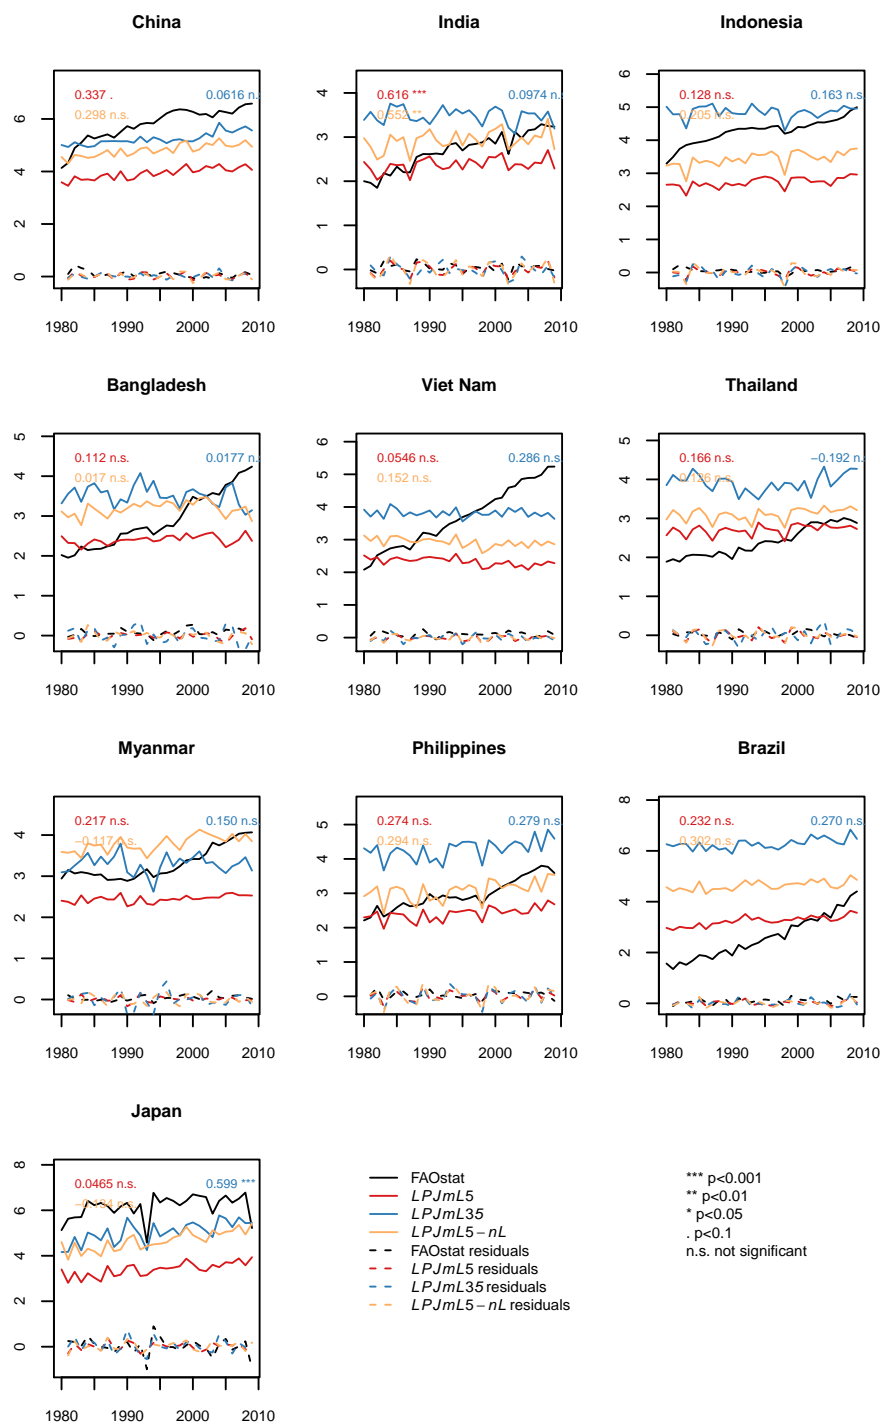

**Figure S26.** Rice yield simulations (in t fresh matter (FM) ha<sup>-1</sup>) for the 10 top-producing countries for the carbon-only LPJmL3.5 version (LPJmL35), the version with N limitation (LPJmL5) and with unlimited N supply (LPJmL5-nL). The residuals plotted are the detrended observed and simulated yields.

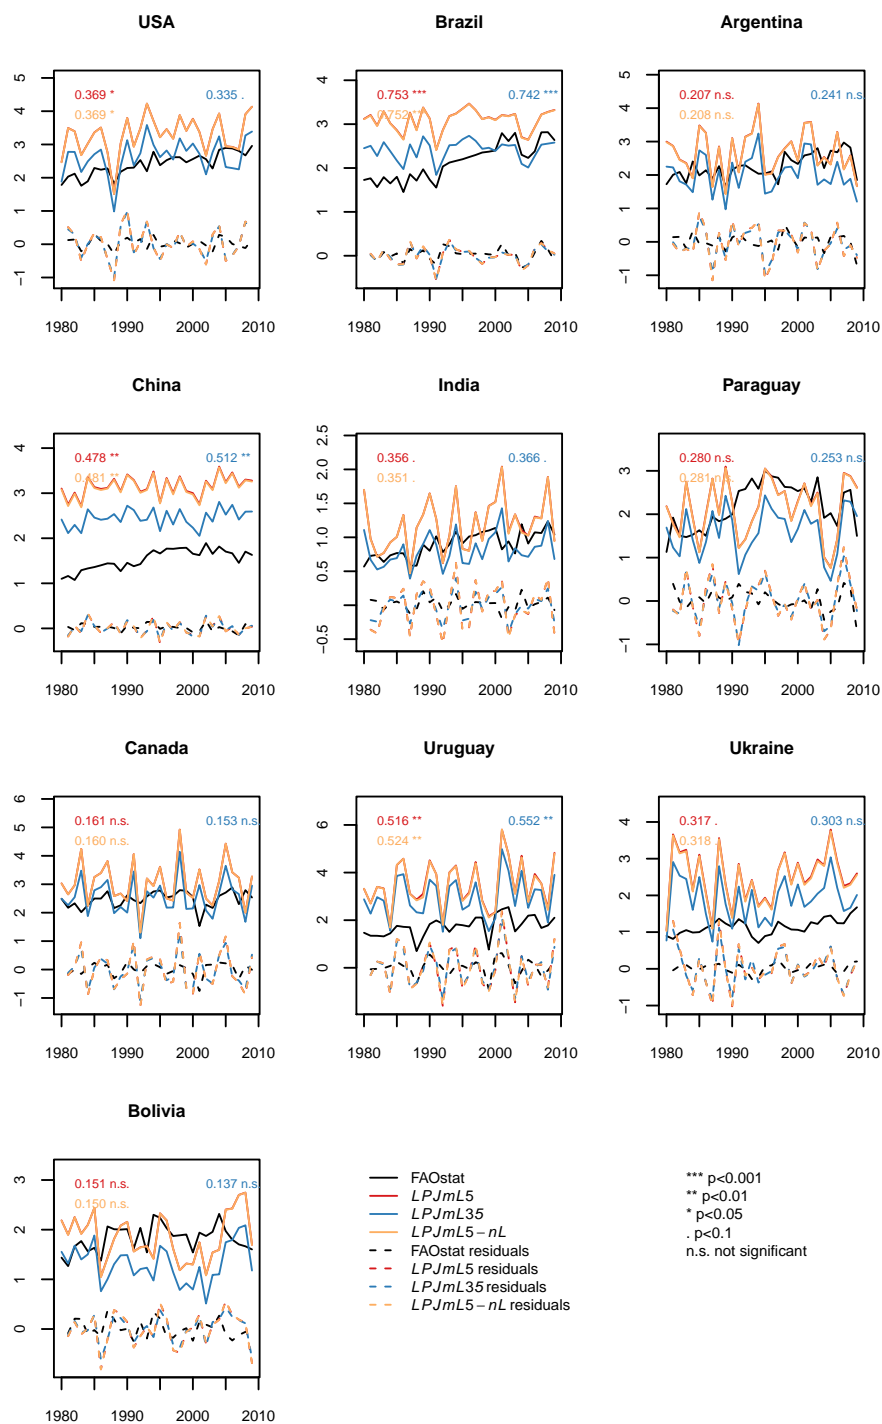

**Figure S27.** Soybean yield simulations (in t fresh matter (FM) ha<sup>-1</sup>) for the 10 top-producing countries for the carbon-only LPJmL3.5 version (*LPJmL35*), the version with N limitation (*LPJmL5*) and with unlimited N supply (*LPJmL5-nL*). The residuals plotted are the detrended observed and simulated yields.
